# Supplementary material
Source: PubMed Central journal article supplement (PMC6450031)

Applied and Environmental Microbiology

**The bHLH transcription factor DevR significantly affects polysaccharide  
metabolism in *Aspergillus oryzae***

Running title: AoDevR affects the polysaccharide metabolism

Miao Zhuang,<sup>a</sup> Zhi-Min Zhang,<sup>a</sup> Long Jin,<sup>a</sup> Bao-Teng Wang,<sup>a</sup> Yasuji Koyama,<sup>b</sup> and  
Feng-Jie Jin<sup>a</sup> #

<sup>a</sup> Co-Innovation Center for Sustainable Forestry in Southern China, College of  
Biology and the Environment, Nanjing Forestry University, 159 Longpan Road,  
Nanjing 210037, China

<sup>b</sup> Noda Institute for Scientific Research, 399 Noda, Noda City 278-0037, Japan

# Corresponding author. Mailing address:

Co-Innovation Center for Sustainable Forestry in Southern China, College of Biology  
and the Environment, Nanjing Forestry University, 159 Longpan Road, Nanjing  
210037, China

Tel.: +86-25-8542-7210, Fax: +86-25-8542-7210, Email: jinfj@njfu.edu.cn.

## Figure legendsy

Fig. S1 Comparison of the deduced amino acid sequence of AO090026000797 with those of *A. nidulans* and *A. fumigatus*. The enclosed regions indicate a putative bHLH-binding domain. AfDEV<sub>R</sub>, Dev<sub>R</sub> of *Aspergillus fumigatus*; ANDEV<sub>R</sub>, Dev<sub>R</sub> of *Aspergillus nidulans*.

Fig. S2 Construction of *AodevR*-disrupted and *AodevR*-overexpressing strains. (A) Construction of the *AodevR* disruptant. The *AodevR* ORF was deleted and replaced by a *pyrG* marker. (B) Confirmation of *AodevR* gene disruption by Southern blot analysis. Genomic DNA was digested with SmaI and hybridized with the indicated probe. The expected DNA sizes are shown by the arrows. Lane 1, parent strain; lanes 2-4, transformants. Band shifts of lane 2 and lane 4 indicate that the *AodevR* ORF was deleted in the two transformants. (C) Construction of the plasmid for *AodevR* overexpression. The full-length *AodevR* ORF was inserted downstream of the *amyB* promoter. (D) Confirmation of the constructed *AodevR*-overexpression strain by Southern blot analysis. Genomic DNAs were digested with PstI and hybridized with the probe (*AodevR* ORF). Lane 1, parent strain; lane 2-7, transformants. The appearance of the second band

indicates that the plasmid was successfully integrated into the parent strain. (E) Confirmation of *AodevR* overexpression by semi-quantitative RT-PCR analysis. Total RNA was isolated from the strains cultured on dextrin-containing CD media for 2 days. The histone H2A as a positive control and negative-control PCR analysis using each mRNA as a template showed no amplified fragments (data not shown).

Fig. S3 Complementation of the *AodevR* deletion strain. (A) Complementation of the *devR* deletion strain by re-integrating the *AodevR* gene into the  $\Delta devR$  strain. The complementation was confirmed by Southern blotting. Genomic DNA was digested with *Sma*I and hybridized with the indicated probe. The expected DNA sizes are shown by the arrows. Lane 1,  $\Delta devR$  strain; lanes 2-3, transformants. (B) Phenotype of the *devR*-restored strain. The generated strain  $\Delta devR$  (*devR*<sup>+</sup>), *devR* disrupted strain ( $\Delta devR$ ), and control strain were spot-cultured on CD+Uridine agar medium at 30°C for 5 days. Their phenotypes were observed and compared.

Fig. S4 Construction of *PthiA*-inducing *AodevR* overexpression strain and phenotypic analysis. (A) Construction of plasmid for *PthiA*-inducing *AodevR* overexpression. *amyB* promoter was replaced by *thiA* promoter to induce *AodevR* expression. (B)

Phenotypic analysis. Strains were cultivated onto the CD(dextrin) agar media at 30 °C for 5 days, and their phenotype was observed and compared. *PthiA-devR*, *PthiA*-inducing *AodevR* overexpression strain; OE-*devR*, *PamyB*-inducing *AodevR* overexpression strain. (C) qPCR analysis. Constructed *PthiA-devR* strain and control strain were cultivated in liquid medium at 30 °C for 2 days and the RNA was extracted. The relative expression levels of *AodevR* and some genes involved in starch degradation were examined and compared by qPCR. The expression levels of the genes were normalized to the expression level of the endogenous control gene histone H2A. The expression value of each gene in the control strain was used as the baseline. For qPCR, three replicates were performed for each sample. The average values and standard deviations were represented as bars and error bars, respectively. Con, Control strain; *PthiA-devR*, *thiA* promoter inducing *AodevR* overexpression strain.

Fig. S1

```
AO090026000797 MEATLTHRPWEPATTGPTPTVSSSQTLPSISTLTASMTSTAAPPAEKSPG-----
AfDEVR METTLTHRPWEPTTTGPNAPTSSAQTLPSISTLTASMASNIPLPAEKSPGNASLNTVER
ANDEVR -----

AO090026000797 -----SSTYSTATNGTGNYP SLSFLTSSQSPN RV S
AfDEVR DSGNWSMPQSTSMISCSSTAMPGTDSLPGSSSTYSTATNGTGNYP SLSFLTSSQSPN RG-
ANDEVR -----

AO090026000797 TVSDRSPYPNDHNSNANTPSSSSGAQPSPNFGSAQPNPALPSINQNYDAPSQRGSIAEPAES
AfDEVR SVSERSPYPNHSSNTNPSSAGAHPSPNFG-SQTNPTLPSLNQNF DAPSQRGSIAEPPES
ANDEVR -----

AO090026000797 RRSSIDSRMNQGISSLAINPASPYHSTNASQTSIVSGLQRERGISMDVNMNNTYRGRYS
AfDEVR RRSSVDSRMNQGISSLAINPASPYHSTNASQTSIVSGLQRERGISMDVNMNNSYRGRYS
ANDEVR -----MNQGISSLDINPTSPYHSTNASQTSIVSSLQRERGI STDN---NTYRGRYS
***** **:*:*****.***** * *:*****

AO090026000797 GGQPLSPLGPRAGEHRGFAAGRTAPAISSNPRSEIYNAEAPTAGLAYAFPDPDVARSN SI
AfDEVR GTQPLSPLGPRAGEHRSFAAGRTAPAISSNPRSEIYAAETPTAGLAYAFPDPDVARSN SM
ANDEVR GTSPLSPLSSRE--HRGFAAGRTAPAISSNPRSEIYNAEAPTAGLAYAFPDPDVS-----
* .*****.* **.*:*****.***** **:*:*****:

AO090026000797 SSTTEKSNAQFCRKGSTAESFSSSIYSDSRLPRGQHGM SICEFGNICRSVGS SKTDHALE
AfDEVR SSTNDKSQHPFSRKGSTAESLASSIYSDARLPRGQH-----E
ANDEVR TRTQSFDRASFSRKPSATESLYKLPAN-----
: * . . . * .** *::*: . .

AO090026000797 LPQNVHHHSLQHKQVRGLIGEADLHSGSTPYSRTPEL RVTHKLAERKRRSEM KDCFEALR
AfDEVR LPQNVHHHTLQHKQVRDLIGDPEPPTSSTPYSRTPEL RVTHKLAERKRRSEM KDCFEALR
ANDEVR ---AHHHHTLQHKQVRGLIGEAEQHSGSTPYSRTPEL RVTHKLAERKRRSEM KDCFEALR
***:*****.***::: :.*****

AO090026000797 MRLPQSQNNKSSKWETLTRAIEYIGQLEK MLSNARRENDLLRTEVDDMRAQLNQQQQQQ
AfDEVR MRLPQSQNNKSSKWETLTRAIEYIGQLEK MLSNARRENDVLRSEVEEMRAQLNQQQQQQ-
ANDEVR LRLPSSQNNKSSKWETLTRAIEYINNLEKQVANFRRDNELLHQELQEMRRQLN----QQQ
:***.*****.***::* :* **::*: *:::* ** **

AO090026000797 ANGQSRPQSMFEHHSMATPQANGQSHG---AMFPSYAPGAGMTQE QPRTLPLPLMNGSVAP
AfDEVR AHQHSRPPSIFEHHPMNGPQANGQSHGPGPAF SNYGPNSSTMMQE QPRTLPLPLVNGPVPAP
ANDEVR SNGQSRTASIFEHHQMPVQSNQVHGPAHGPVVTGYSGSPGAAEQPRTLPLPLMNGSVAP
:::* . * :**** * . . . . . :*****:*.***

AO090026000797 MQGVQYTDERR
AfDEVR MQGVQYTDERR
ANDEVR MQGVQYTDERR
*****:*
```

— bHLH binding domain

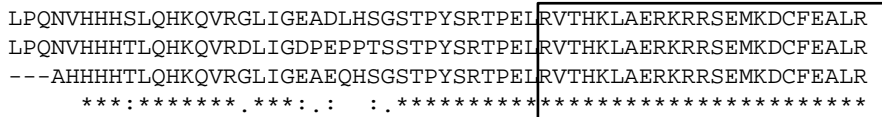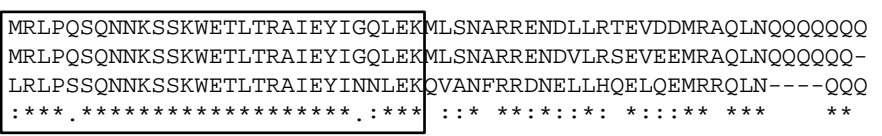

Fig. S2

**A**

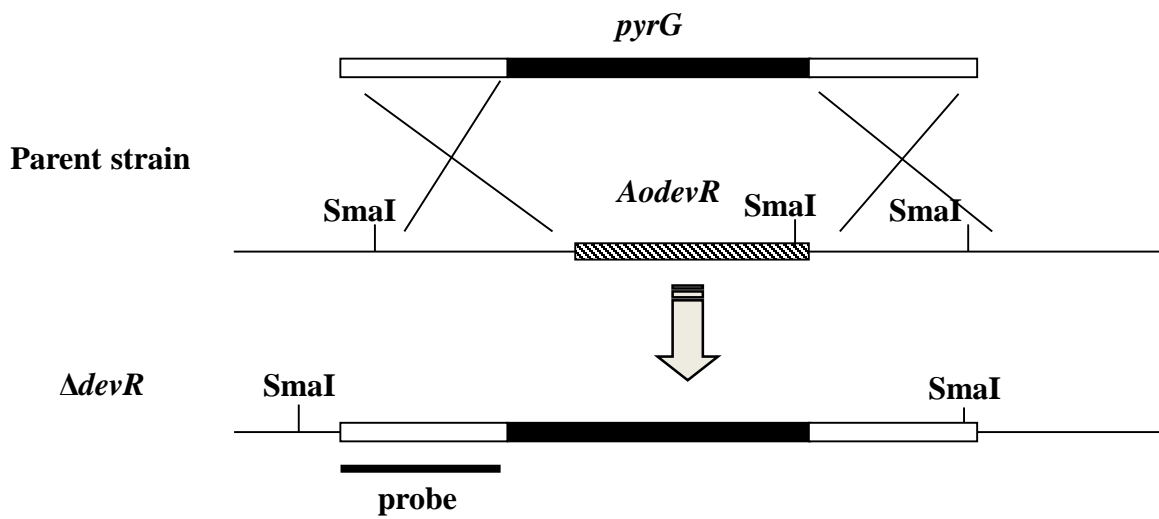

**B**

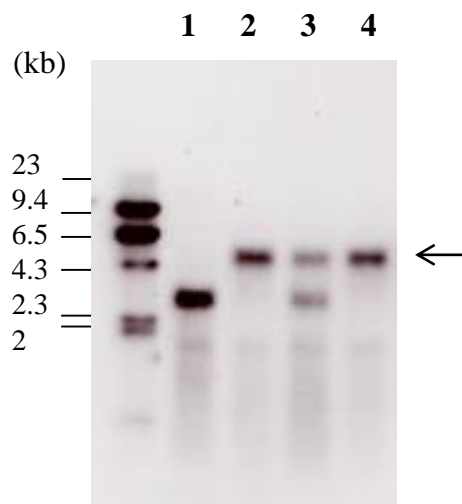

Fig. S2

C

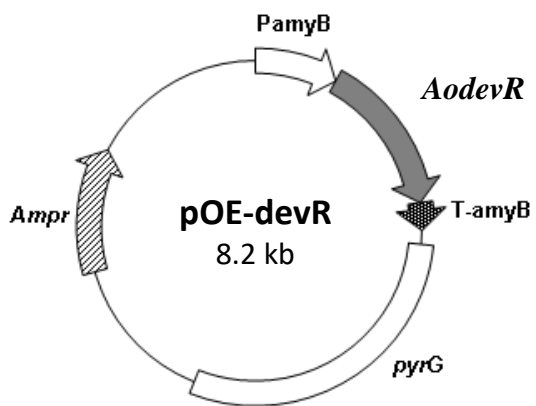

D

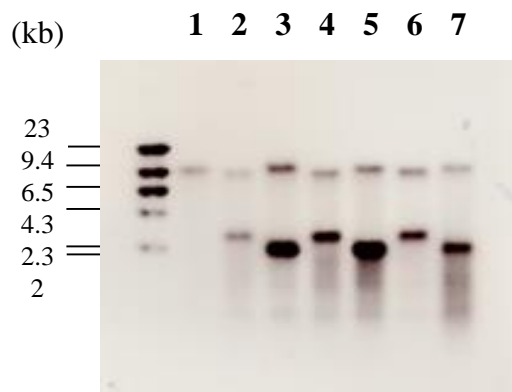

E

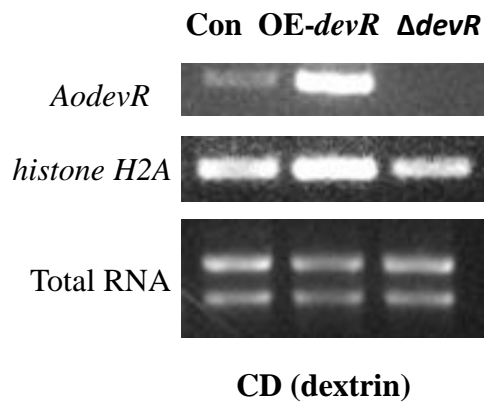

Fig. S3

A

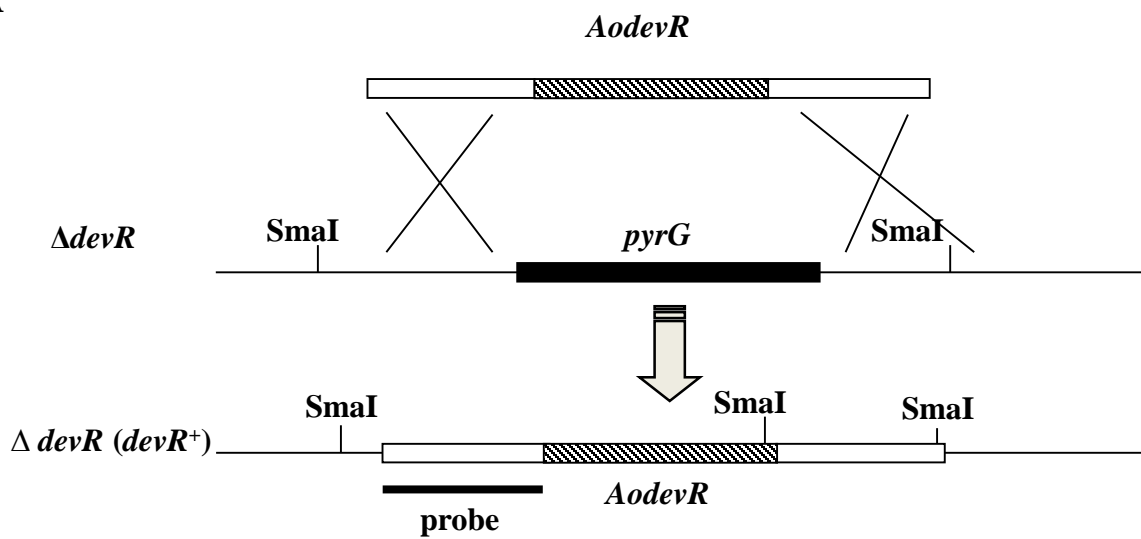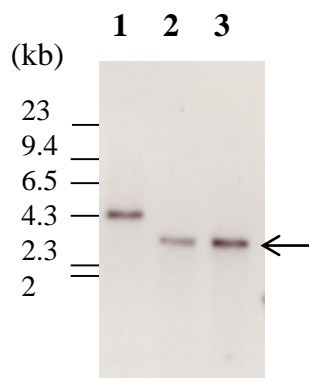

B

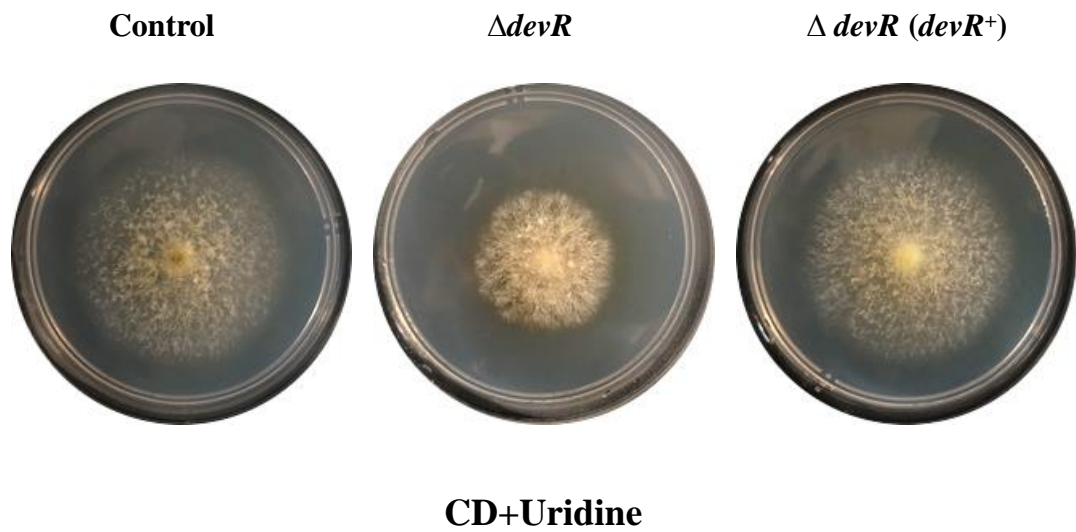



Fig. S4

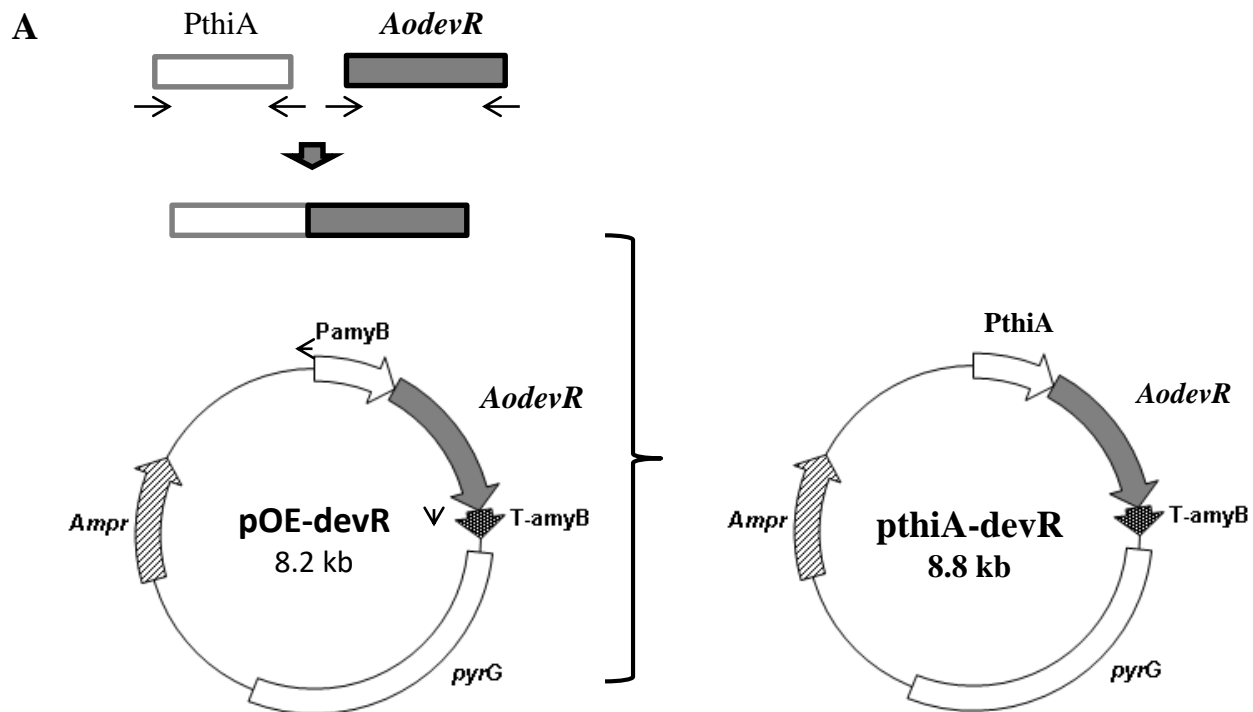

**B**

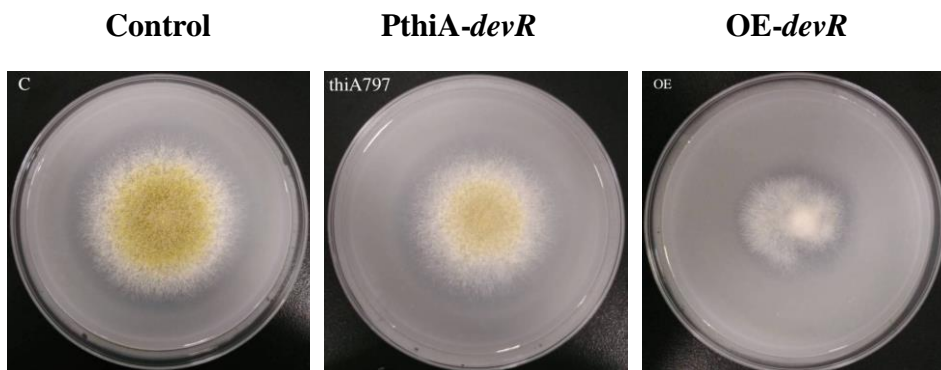

**CD (dextrin)**

Fig. S4

C

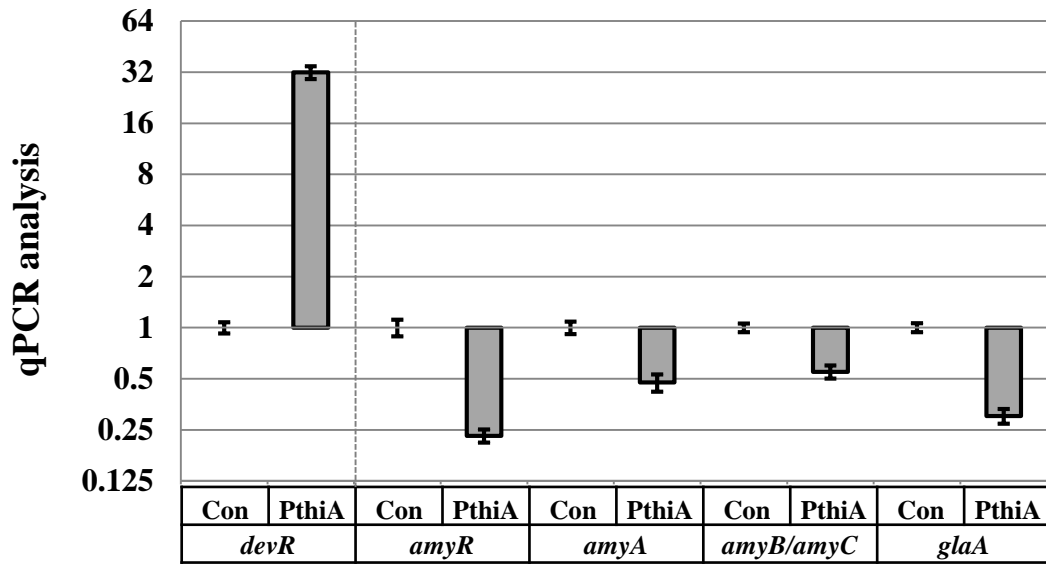

Supplement: AEM.00089-19-s0001.pdf [file AEM.00089-19-s0001.pdf]
